# Supplementary material for: Development and deployment of a mid-cost CO 2 sensor monitoring network to support atmospheric inverse modeling for quantifying urban CO 2 emissions in Paris
Source: Copernicus journal article supplement (doi:10.5194/egusphere-2024-125), 2024-01-25
Supplement: Supplementary file 1 [file egusphere-2024-125-supplement.pdf]

# Supplement

## Development and deployment of a mid-cost CO<sub>2</sub> sensor monitoring network to support atmospheric inverse modeling for quantifying urban CO<sub>2</sub> emissions in Paris

5 Jinghui Lian<sup>1,2</sup>, Olivier Laurent<sup>2</sup>, Mali Chariot<sup>2</sup>, Luc Lienhardt<sup>3</sup>, Michel Ramonet<sup>2</sup>, Hervé Utard<sup>1</sup>, Thomas Lauvaux<sup>3</sup>, François-Marie Bréon<sup>2</sup>, Grégoire Broquet<sup>2</sup>, Karina Cucchi<sup>1</sup>, Laurent Millair<sup>1</sup> and Philippe Ciais<sup>2</sup>

<sup>1</sup> Origins.earth, SUEZ Group, Tour CB21, 16 Place de l'Iris, 92040 Paris La Défense Cedex, France

<sup>2</sup> Laboratoire des Sciences du Climat et de l'Environnement (LSCE), IPSL, CEA-CNRS-UVSQ, Université Paris-Saclay, 91191 Gif sur Yvette Cedex, France

10 <sup>3</sup> Groupe de Spectrométrie Moléculaire et Atmosphérique (GSMA), Université de Reims-Champagne Ardenne, UMR CNRS 7331, Reims, France

*Correspondence to:* Jinghui Lian (jinghui.lian@suez.com) and Olivier Laurent (olivier.laurent@lsce.ipsl.fr)

### **This PDF file includes:**

Figures S1 to S9

15 Table S1

SI References

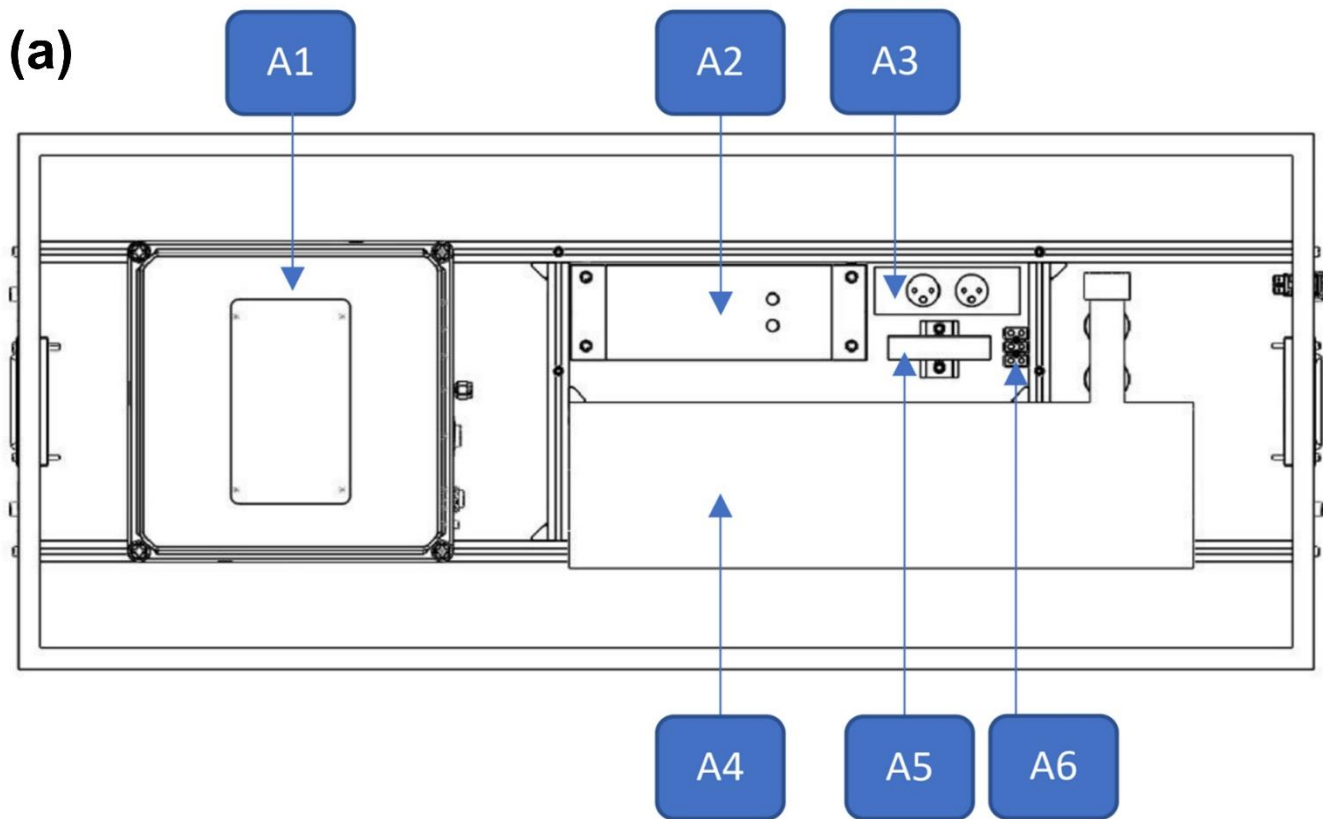

| Item                             | Description                                                              |
|----------------------------------|--------------------------------------------------------------------------|
| A1 Slot for HPP sensor box       | The HPP sensor box is installed by affixing it with four threaded screws |
| A2 Slot for flushing pump        | Optional                                                                 |
| A3 Power strips                  | Slot 1: HPP sensor box. Slot 2: flushing pump                            |
| A4 Slot for target gas container | 5L tank                                                                  |
| A5 12V power supply              | For supplying the container fans                                         |
| A6 Terminal block                | The connection to the electrical network is done from here               |

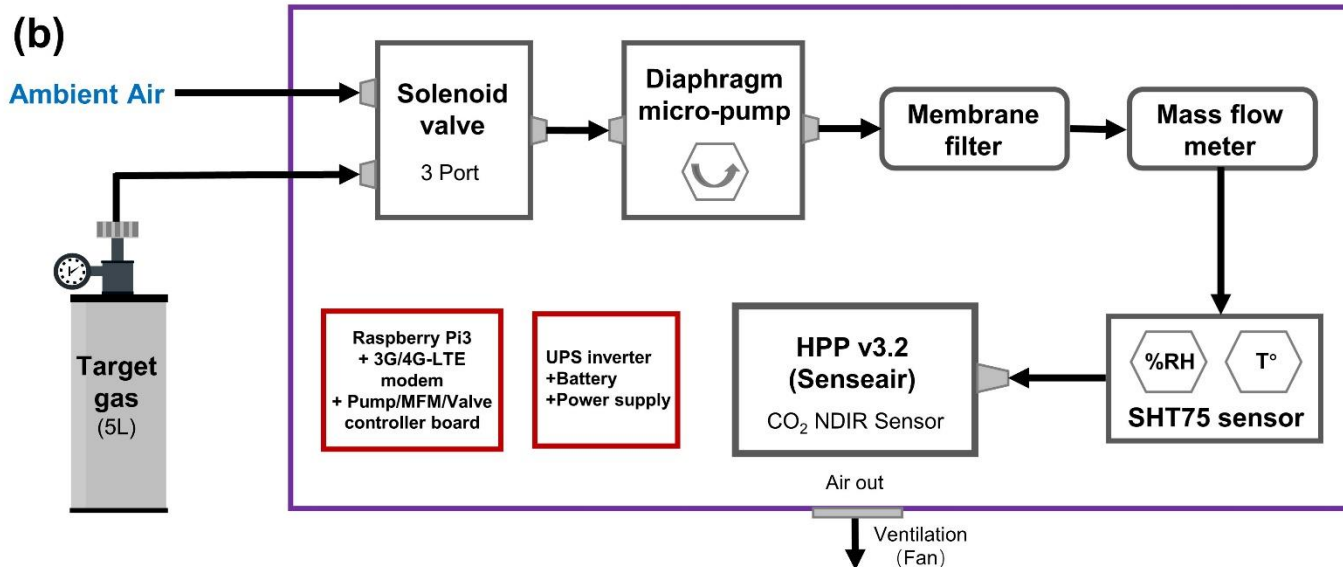

Figure S1. (a) Schematic of the integrated HPP CO<sub>2</sub> instrument for the field deployment, (b) Plumbing design of the airflow inside the integrated HPP sensor box, as shown in Figure 1b and located at A1 in (a). Figure (a) was made by © Eloneo (<https://eloneo.fr/>)

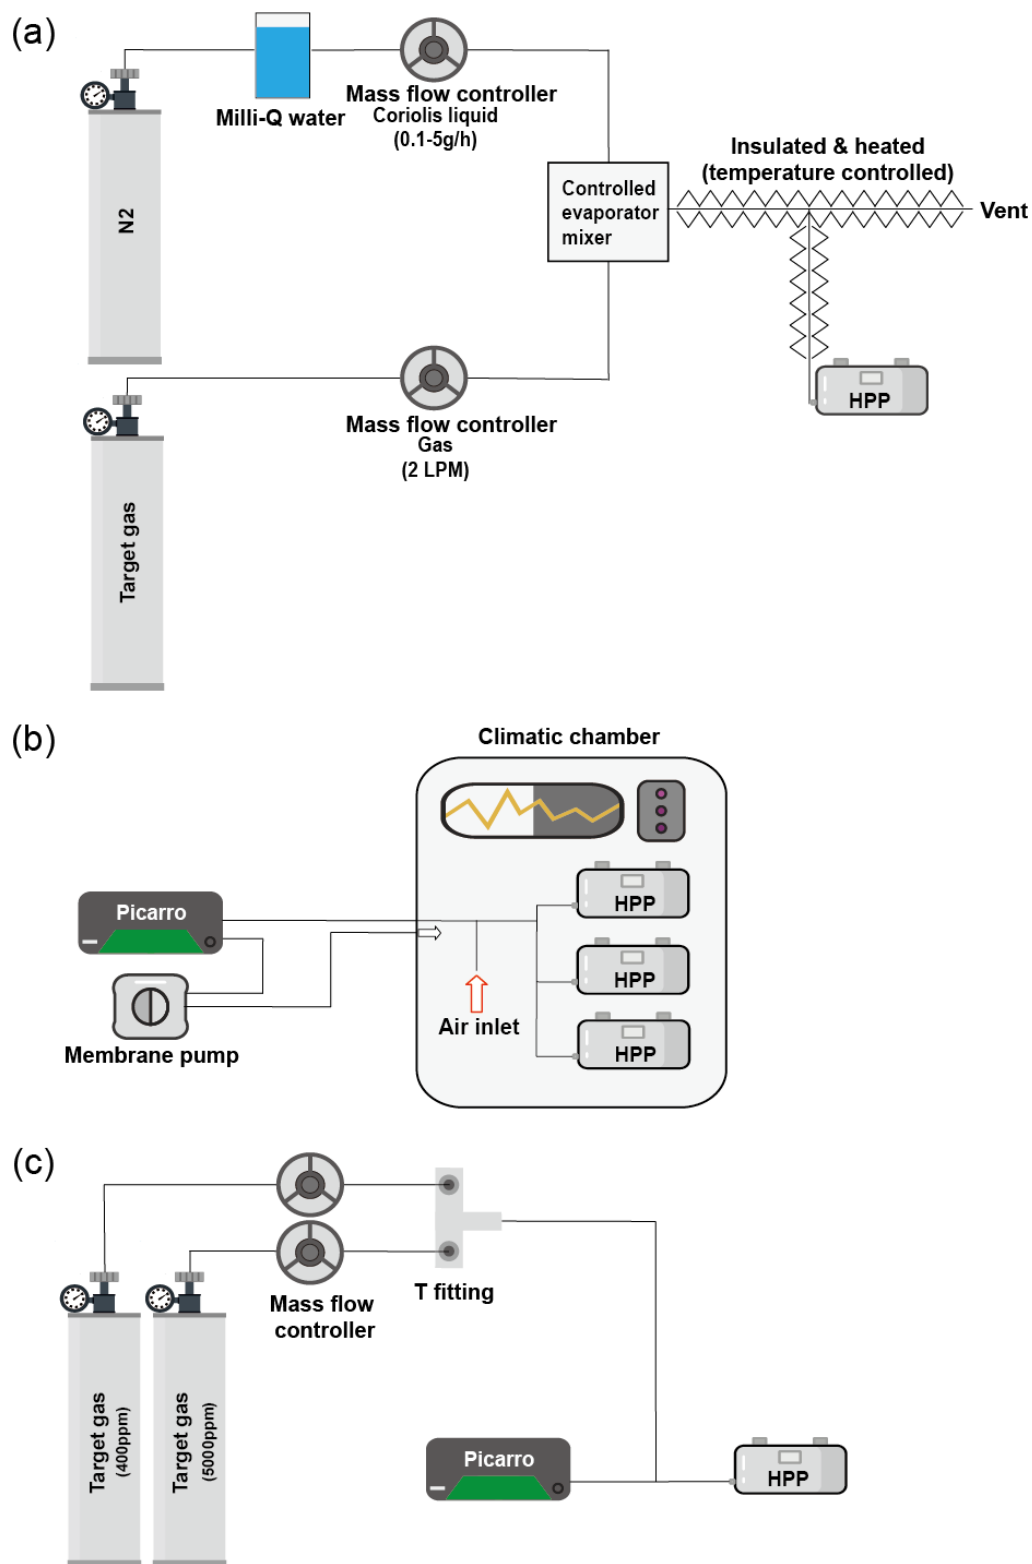

**Figure S2. Schematic of the HPP laboratory (a) water vapor sensitivity test, (b) pressure and temperature sensitivity tests and (c) CO<sub>2</sub> sensitivity test for the calibration procedure. Note that all 8 HPP instruments have been subjected to these tests.**

(a) H<sub>2</sub>O (Quadratic polynomial regression)

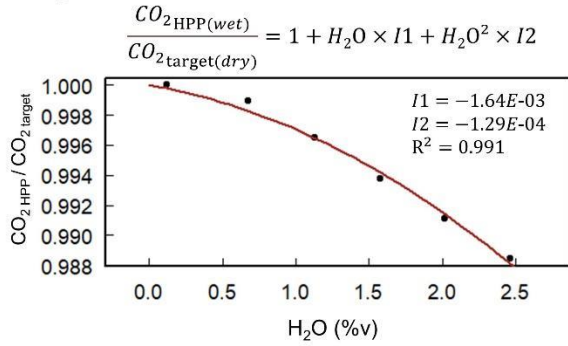

(b) Pressure (Linear regression)

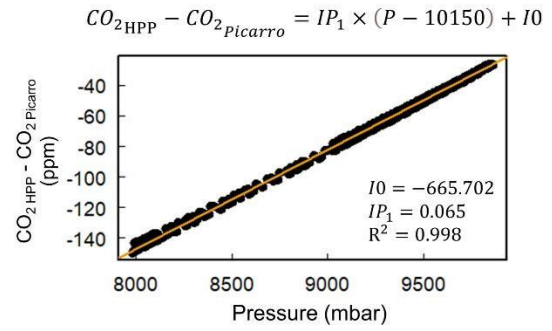

(c) Temperature (Quadratic polynomial regression)

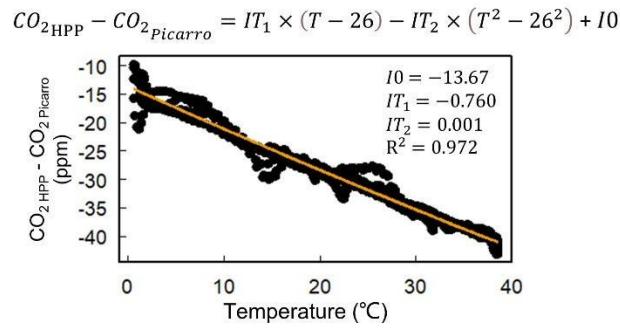

(d) CO<sub>2</sub> mole fraction (Linear regression)

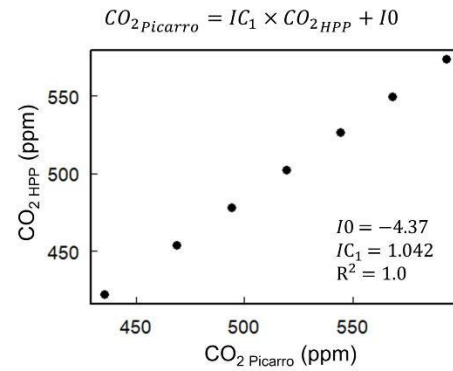

Figure S3. Relationships between the raw 1-minute averaged CO<sub>2</sub> mole fraction reported by one of the HPP sensors (HPP3) and variations in H<sub>2</sub>O, T, p and CO<sub>2</sub> mole fraction in the sensitivity tests, respectively. The derived regression coefficients are used in the CO<sub>2</sub> calibration equation.

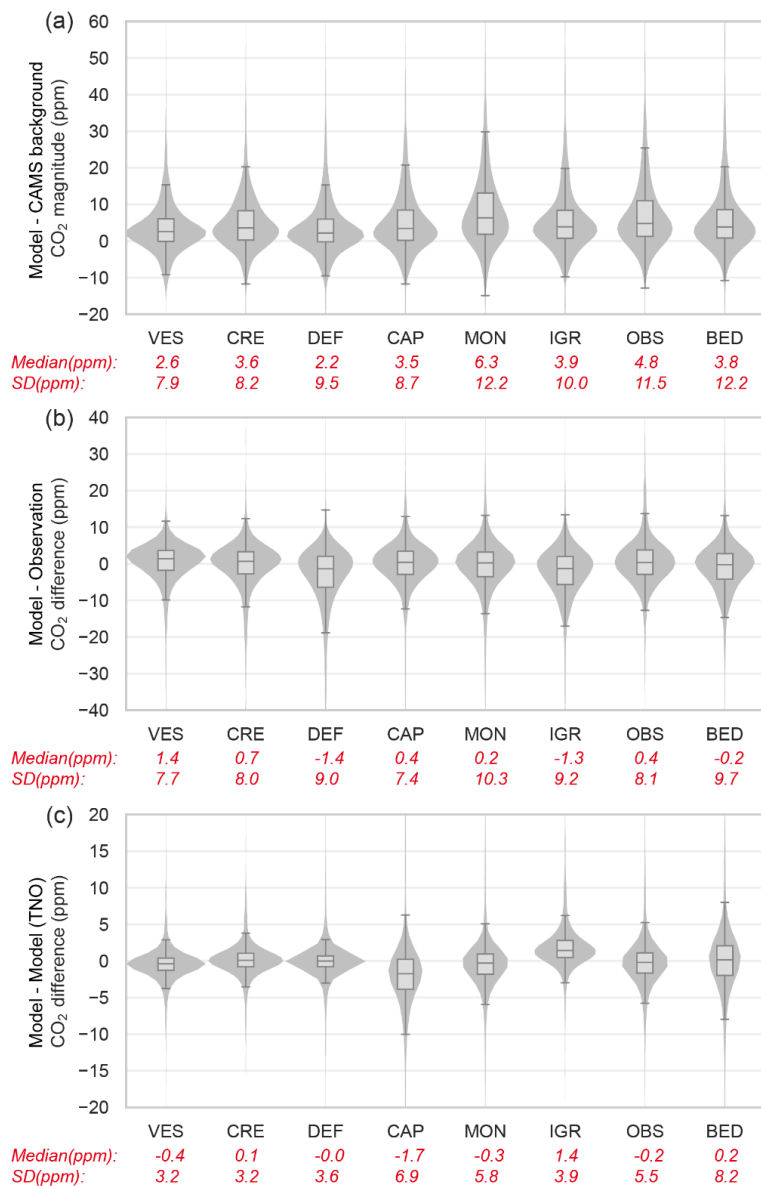

**Figure S4. (a) Distribution of the local hourly afternoon (12-17 UTC) CO<sub>2</sub> signals at each HPP station from July 2020 to December 2022. This is computed by using the WRF-Chem simulated total CO<sub>2</sub> (fossil fuel, biogenic, and background sources) minus the background CO<sub>2</sub> mole fractions derived from the CAMS dataset. (b) Distribution of the differences in hourly afternoon CO<sub>2</sub> mole fraction between the WRF-Chem model and the observations at each HPP station from July 2020 to December 2022. (c) Distribution of the differences in simulated hourly afternoon CO<sub>2</sub> mole fraction, using Origins.earth (default) and TNO 1km inventory (Dellaert et al., 2019) as fossil fuel CO<sub>2</sub> emission inputs for the WRF-Chem model respectively. This model sensitivity test was carried out for the year 2018 (Lian et al., 2023). The midpoint, the box and the whiskers represent the 0.5 quantile, 0.25/0.75 quantiles, and 0.1/0.9 quantiles respectively.**

**SI Reference:**

Dellaert S., Super I., Visschedijk A., Denier van der Gon H.A.C.: High resolution scenarios of CO<sub>2</sub> and CO emissions. <https://www.che-project.eu/sites/default/files/2019-05/CHE-D4-2-V1-0.pdf>, 2019.

Lian, J., Lauvaux, T., Utard, H., Bréon, F.-M., Broquet, G., Ramonet, M., Laurent, O., Albarus, I., Chariot, M., Kotthaus, S., Haeffelin, M., Sanchez, O., Perrussel, O., Denier van der Gon, H. A., Dellaert, S. N. C., and Ciais, P.: Can we use atmospheric CO<sub>2</sub> measurements to verify emission trends reported by cities? Lessons from a 6-year atmospheric inversion over Paris, *Atmos. Chem. Phys.*, 23, 8823–8835, <https://doi.org/10.5194/acp-23-8823-2023>, 2023.

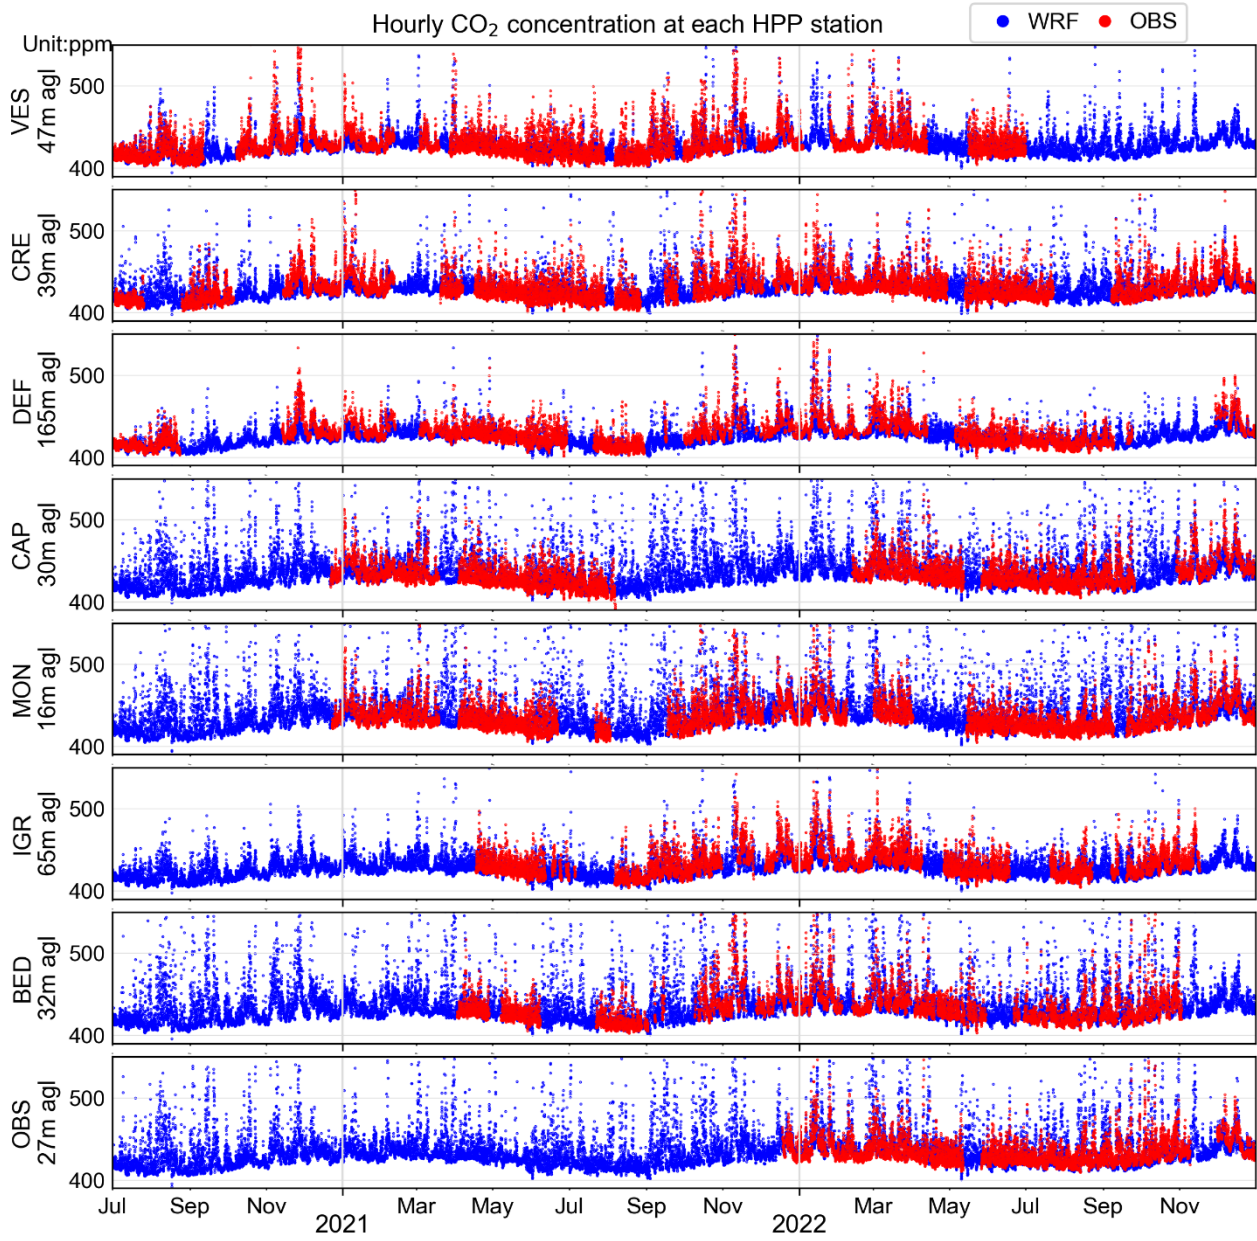

**Figure S5. Time series of the modeled and observed hourly CO<sub>2</sub> concentration at each HPP station.**

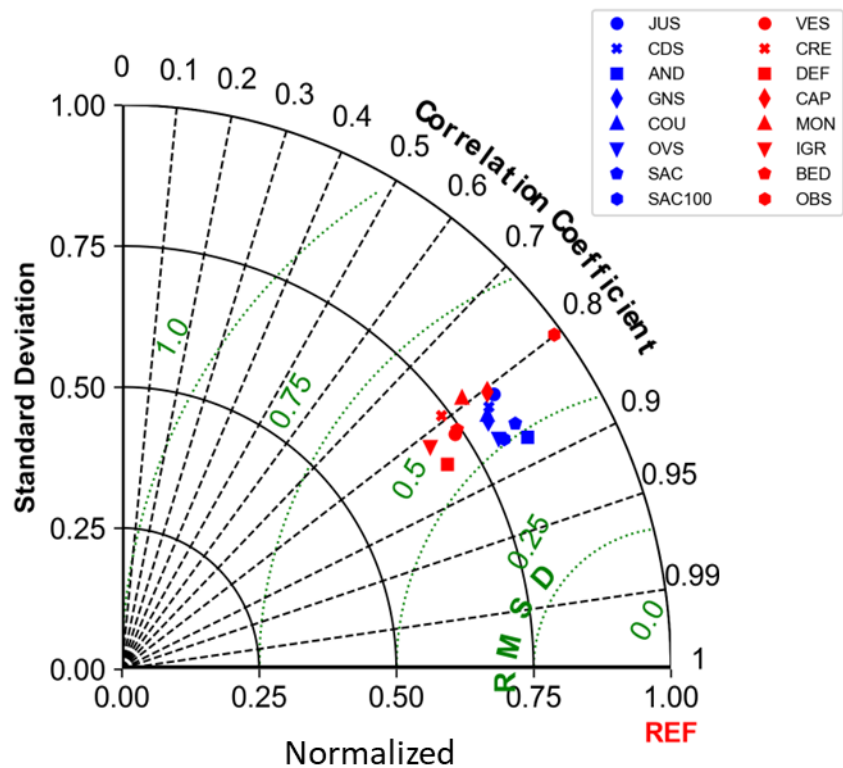

**Figure S6.** Comparisons of the observed and modeled hourly afternoon (12-17 UTC) CO<sub>2</sub> mole fractions at 7 CRDS and 8 HPP stations over the period of July 2020 to December 2022. The SAC station has two air inlets placed at 15 m and 100 m above ground level, respectively.

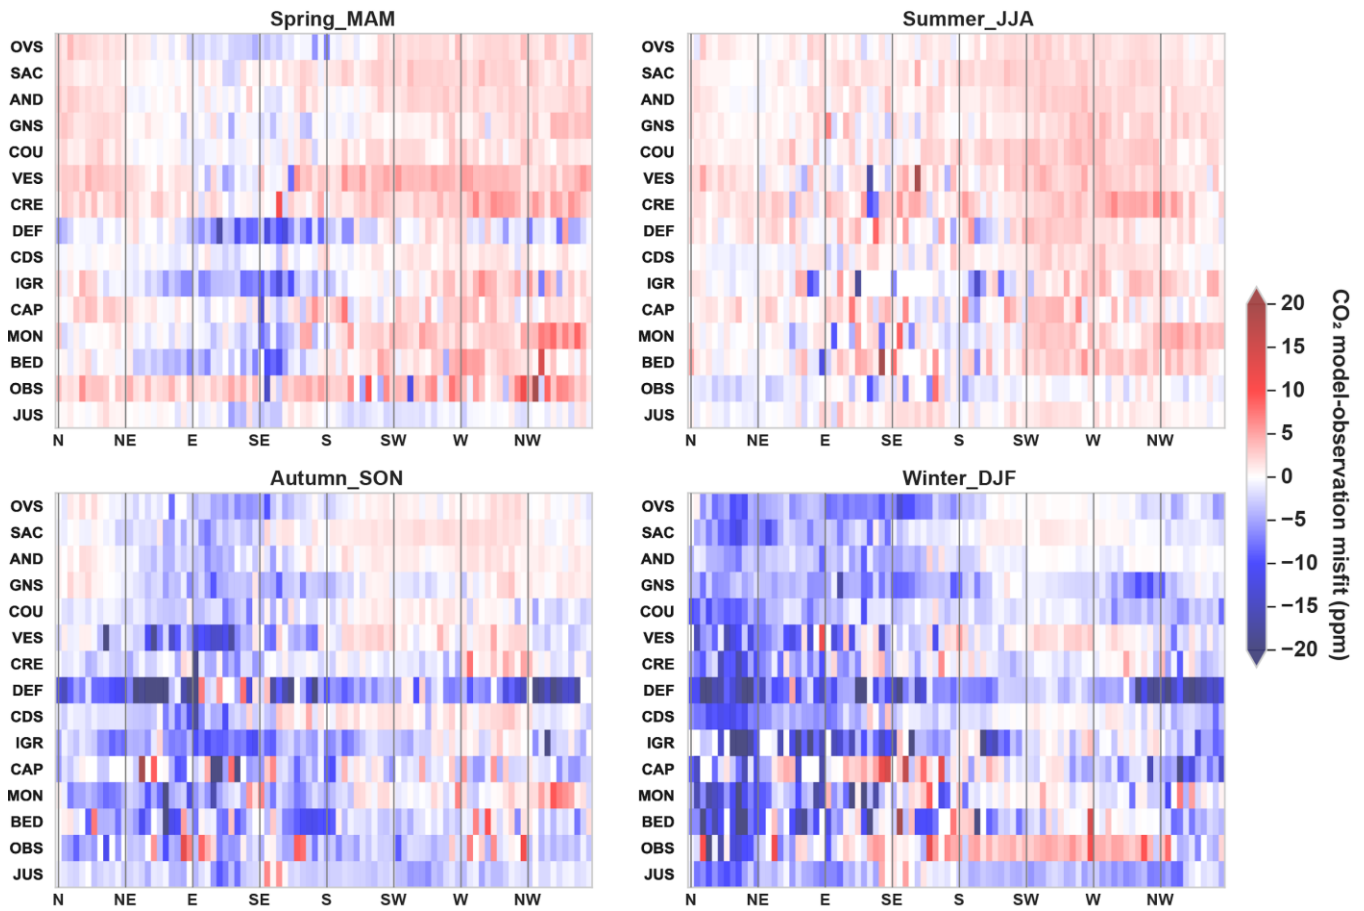

Figure S7. Model-observation misfits in hourly afternoon (12-17 UTC) CO<sub>2</sub> mole fractions, averaged accounting for wind direction for four seasons at 7 CRDS and 8 HPP stations over the period of July 2020 to December 2022. The stations are displayed in a bottom-to-top sequence, corresponding to their increasing distance from the JUS station.

5

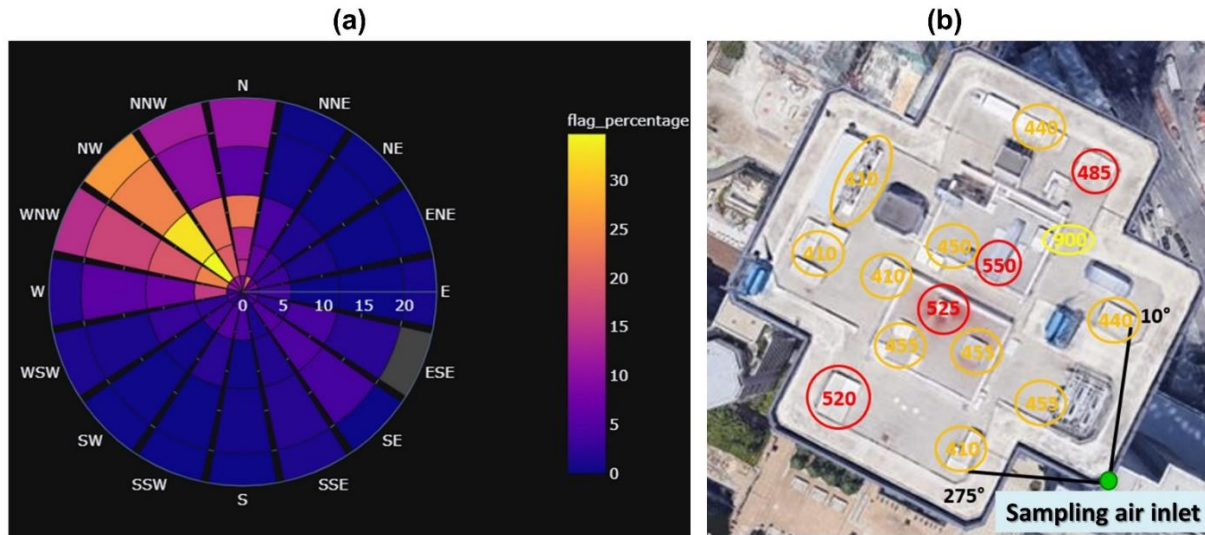

Figure S8. (a) Average spike percentage of observed CO<sub>2</sub> mole fractions as a function of wind speed and direction at DEF station from January to May 2021. (b) A photo of the rooftop at DEF station indicates potential local sources of contamination, primarily originating from the direction spanning 275° to 10°. Red circle: active and high-flow sources of contamination during the visit. Orange circle: potential sources of contamination not active or low flow during the visit. Yellow circle: a source of active contamination but

10



structurally at low flow (e.g., sanitary facilities). Green dot: the location of the sampling air inlet. The image in (b) was extracted from © google map.

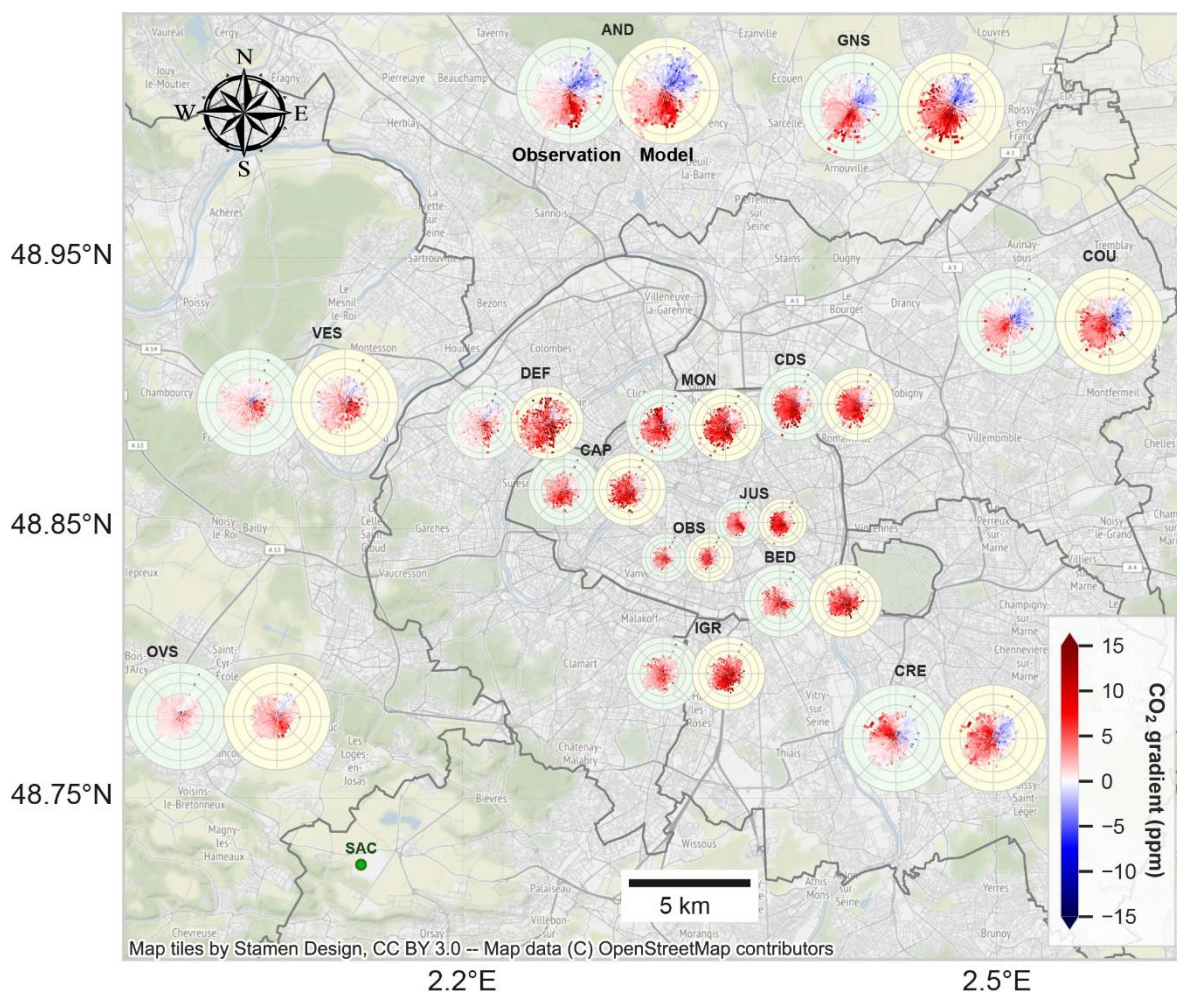

5 **Figure S9. Observed (green panel) and modeled (yellow panel) CO<sub>2</sub> mole fraction differences between SAC and all the other stations, averaged accounting for wind speed and direction over the period of July 2020 to December 2022. Only the afternoon (12-17 UTC) data are used. The different sizes of the polar panels hold no specific meaning and are merely adjusted to avoid overlaps.**

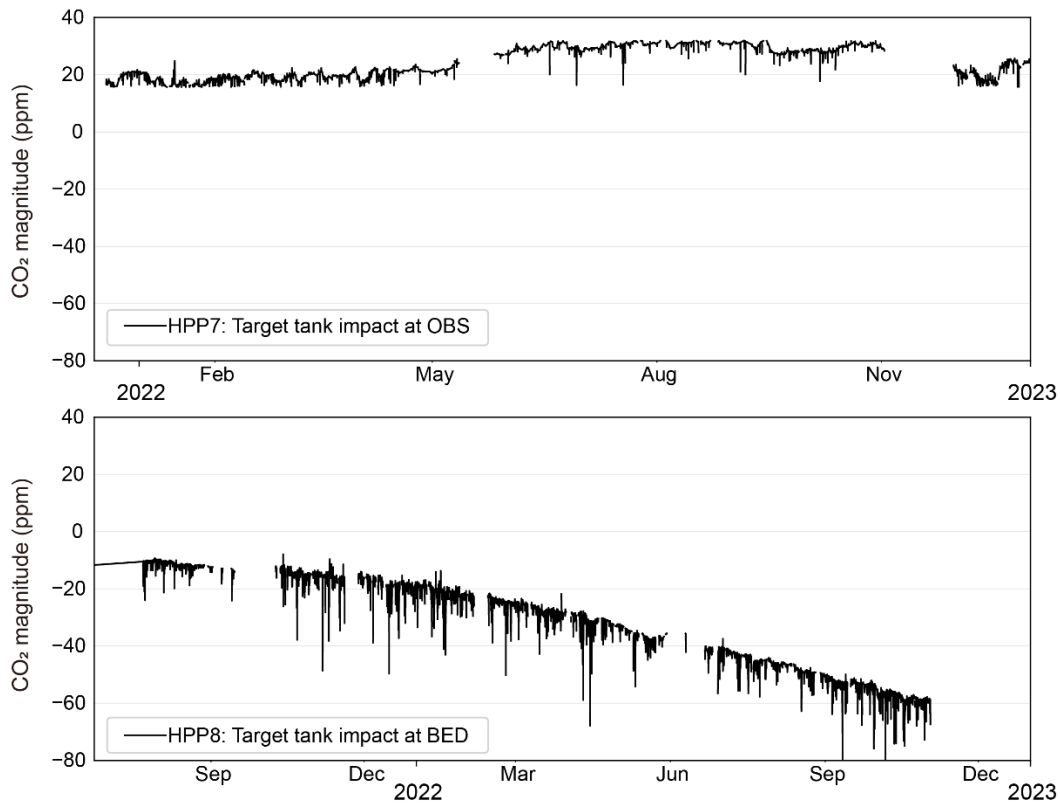

**Figure S10. Evolution of the impact of the daily target gas injection in the calibration at two HPP sensors. It was calculated as the  $CO_2$  differences before and after applying  $CO_{2offset}$  in Eq. (1).**

**5 Table S1. Ranges of acceptable values for critical physical parameters measured by the HPP instrument.**

| <b>Parameter (unit)</b>           | <b>Min value</b> | <b>Max value</b> |
|-----------------------------------|------------------|------------------|
| H <sub>2</sub> O (molar fraction) | 0.2%             | 4%               |
| Pump speed                        | 0.1              | 0.95             |
| Flowrate (L/min)                  | 0.4              | N/A              |
| CO <sub>2</sub> (ppm)             | 350              | 700              |
| Detector temperature (°C)         | 64.98            | 65.02            |
| Main mirror temperature (°C)      | 66.90            | 67.10            |
| Component block temperature (°C)  | 66.90            | 67.10            |
| Microcontroller temperature (°C)  | 0                | 50               |
